# Supplementary material for: Exome genotyping and linkage analysis identifies two novel linked regions and replicates two others for myopia in Ashkenazi Jewish families
Source: BMC Med Genet. 2019 Jan 31;20:27. doi: 10.1186/s12881-019-0752-8 (PMC6357511; doi:10.1186/s12881-019-0752-8)
Supplement: Supplementary file 1 — Table S1. SNPs not released due to technical failure. A detailed list of the number of SNPs that failed at different points of the technical quality control. (XLSX 10 kb) [file 12881_2019_752_MOESM1_ESM.xlsx]

## Sheet: Sheet1
Table S1: SNPs not released due to technical failure
	Number of SNPs
Autosomal criteria:
Autosomal SNP with call rate less than 95%	4093
Autosomal SNP with Cluster Sep less than 0.3	8486
Autosomal SNP with a heterozygote rate greater than or equal to 0.8	17
Autosomal SNP not callable after manual review	455
Autosomal SNP with more than 0 HapMap replicate error(s)	222
Autosomal SNP with absolute difference in heterozygote rate between genders greater than 9%	1
X chromosome criteria:
X chromosome SNP with a call rate less than 95%	181
X chromosome SNP with Cluster Sep less than 0.3	105
X chromosome SNP not callable after manual review	11
X chromosome SNP with more than 0 HapMap replicate error(s)	18
X chromosome SNP with male heterozygote rate greater than 0.15%	91
All Mitochondrial, XY and Y SNPs were manually reviewed and reclustered or dropped if appropriate
XY chromosome criteria:
XY SNP not callable after manual review	4
XY SNP with a call rate less than 95%	7
XY SNP with Cluster Sep less than 0.3	1
Mito chromosome criteria:
Mito SNP not callable after manual review	31
Mito SNP with a call rate less than 95%	2
Mito SNP with Cluster Sep less than 0.3	13
Y chromosome criteria:
Y chromosome SNP not callable after manual review	29
