# Supplementary material for: Exome genotyping and linkage analysis identifies two novel linked regions and replicates two others for myopia in Ashkenazi Jewish families
Source: BMC Med Genet. 2019 Jan 31;20:27. doi: 10.1186/s12881-019-0752-8 (PMC6357511; doi:10.1186/s12881-019-0752-8)
Supplement: Supplementary file 6 — Table S6. Annotation of Suggestive and Significantly Linked Variants on chromosome 8 sorted by base pair start location - Two Point Linkage Results. A list of all variants on chromosome 8 that were either significantly or suggestively linked, along with annotations provided by annovar. (XLSX 11 kb) [file 12881_2019_752_MOESM6_ESM.xlsx]

## Sheet: Sheet1
Table S6: Annotation of Suggestive and Significantly Linked Variants on chromosome 8 sorted by base pair start location - Two Point Linkage Results
Chr	Start	End	Ref	Alt	LOD_ALL	HLOD	Alpha	Func.knowngene	Gene.knowngene	ExonicFunc.knowngene	AAChange.knowngene	1000G_ALL	1000G_AFR	1000G_AMR	1000G_EAS	1000G_EUR	1000G_SAS	dbSNP	SIFT_score	SIFT_pred	Polyphen2_HVAR_score	Polyphen2_HVAR_pred	CADD_raw	CADD_phred
8	12662409	12662409	G	A	-2.2726	2.52345	0.4	ncRNA_intronic	LINC00681;LOC340357			0.45	0.27	0.6	0.55	0.54	0.38	rs4313158	.	.	.	.	.	.
8	12662523	12662523	G	A	-2.2728	2.52318	0.4	ncRNA_intronic	LINC00681;LOC340357			0.45	0.27	0.6	0.55	0.54	0.39	rs7463232	.	.	.	.	.	.
8	12663987	12663987	C	T	-1.9337	2.56739	0.4	ncRNA_intronic	LINC00681;LOC340357			0.52	0.45	0.61	0.61	0.57	0.41	rs10081610	.	.	.	.	.	.
8	12664062	12664062	G	A	-2.5516	2.30497	0.35	ncRNA_intronic	LINC00681;LOC340357			0.48	0.38	0.61	0.55	0.54	0.38	rs10101534	.	.	.	.	.	.
8	12664317	12664317	A	T	-2.5518	2.30474	0.35	ncRNA_intronic	LINC00681;LOC340357			0.48	0.38	0.61	0.55	0.54	0.38	rs7828368	.	.	.	.	.	.
8	134233024	134233024	C	T	3.7482	3.7482	1	exonic	WISP1	nonsynonymous SNV	WISP1:NM_003882:exon3:c.G550T:p.V184L	.	.	.	.	.	.	.	0.067	T	0.34	B	1.326	12.41
	Legend
	Chr = Chromosome position
	Start = start position of marker
	End = end position of marker
	Ref = reference allele
	Alt = alternate allele
	LOD_ALL = cumulative LOD score of region across all families
	HLOD = HLOD score of region across all families
	Alpha = Alpha of HLOD score
	Func.knowngene = location of variant (exonic, intronic, intergenic, etc)
	Gene.knowngene = gene location of variant
	ExonicFunc.knowngene = exonic function of variant (if exonic)
	AAChange.knowngene = amino acid change in protein
	1000G_ALL = 1000Genomes Frequency for all populations
	1000G_AFR = 1000Genomes Frequency for Africans
	1000G_AMR = 1000Genomes Frequency for ad mixed Americans
	1000G_EAS = 1000Genomes Frequency for East Asians
	1000G_EUR = 1000Genomes Frequency for Europeans
	1000G_SAS 1000Genomes Frequency for South Asians
	dbSNP = rsID for SNP
	SIFT_score = SIFT score
	SIFT_pred = protein prediction based on SIFT (T = tolerated)
	Polyphen2_HVAR_score = PolyPhen2 score
	Polyphen2_HVAR_pred = protein prediction by PolyPhen2 (B = benign)
	CADD_raw = CADD raw score
	CADD_phred = CADD phred score
